# Supplementary material for: Integral Use of Red Wine Pomace after Hydrostatic High Pressure: Application of Two Consecutive Cycles of Treatment
Source: MDPI journal article supplement (doi:10.3390/foods13010149), 2024-01-01
Supplement: s1 [file s1]

## Supplementary material

Table S1. Color changes ( $\Delta E$ ) of the high pressure treated RGP stored at different temperatures.

|                           | Refrigeration (4°C) |      |      |        |        | Room (20°C) |      |      |        |        |
|---------------------------|---------------------|------|------|--------|--------|-------------|------|------|--------|--------|
|                           | Control             | HHP1 | HHP2 | 2      | 2      | Control     | HHP1 | HHP2 | 2      | 2      |
|                           |                     |      |      | cycles | cycles |             |      |      | cycles | cycles |
|                           |                     |      |      | (a)    | (b)    |             |      |      | (a)    | (b)    |
| $\Delta E$ processing     | -                   | 0.3  | 0.5  | 0.6    | 0.8    | -           | 0.3  | 0.5  | 0.6    | 0.8    |
| $\Delta E$ storage 1-30d  | 0.4                 | 0.4  | 0.3  | 0.6    | 0.7    | 0.5         | 0.4  | 0.3  | 0.7    | 1.0    |
| $\Delta E$ storage 1-90d  | 0.5                 | 0.5  | 0.4  | 0.4    | 0.6    | 1.0         | 1.0  | 0.8  | 0.8    | 0.9    |
| $\Delta E$ storage 1-180d | 1.0                 | 0.6  | 0.7  | 0.4    | 0.6    | 2.3         | 1.4  | 1.1  | 1.1    | 1.2    |
| $\Delta E$ storage 1-270d | 1.3                 | 1.0  | 0.5  | 0.6    | 0.6    | 2.0         | 1.8  | 1.5  | 1.4    | 1.3    |
